# Supplementary material for: Ultrafine molybdenum phosphide nanocrystals on a highly porous N,P-codoped carbon matrix as an efficient catalyst for the hydrogen evolution reaction
Source: Royal Society of Chemistry journal article supplement (doi:10.1039/c8qm00226f), 2018-01-01
Supplement: c8qm00226f1.pdf [file c8qm00226f1.pdf]

## Supporting Information

### **Ultrafine molybdenum phosphide nanocrystals on highly porous N,P-codoped carbon matrix as efficient catalyst for hydrogen evolution reaction**

*Jin-Tao Ren*<sup>a,b</sup>, *Lei Chen*<sup>a,b</sup>, *Chen-Chen Weng*<sup>a,b</sup> and *Zhong-Yong Yuan*<sup>a,b,\*</sup>

<sup>a</sup> National Institute for Advanced Materials, School of Materials Science and Engineering, Nankai University, Tongyan Road 38, Haihe Educational Park, Tianjin 300350, China

<sup>b</sup> Key Laboratory of Advanced Energy Materials Chemistry (Ministry of Education), Collaborative Innovation Center of Chemical Science and Engineering (Tianjin), Nankai University, Weijin Road 94, Tianjin 300071, China

\* Corresponding author. Email: zyyuan@nankai.edu.cn

# 1. Supplementary Figures

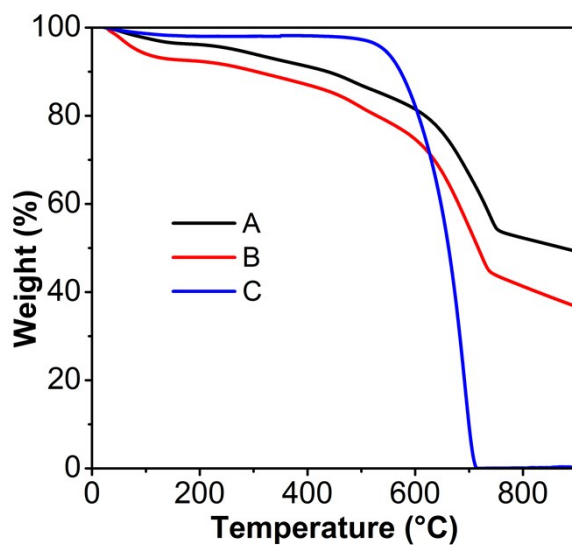

**Fig. S1** Thermal gravimetric curves of polymeric precursor of MoP@NPCF (A), polymeric precursor of MoP@NPCS (B), and g-C<sub>3</sub>N<sub>4</sub> monolith (C).

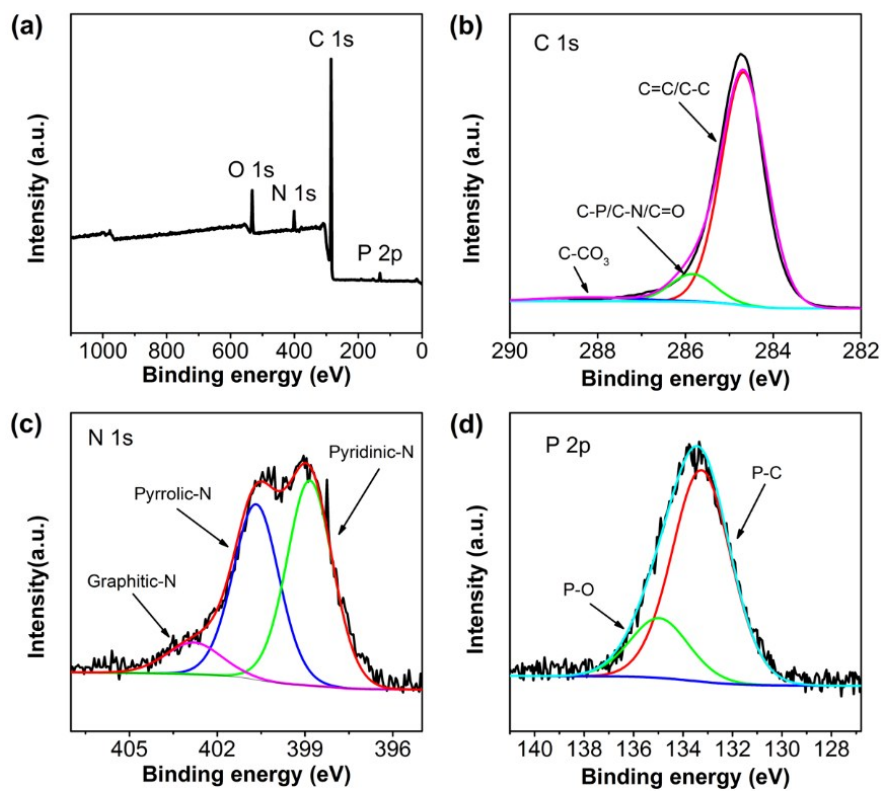

**Fig. S2** (a) XPS survey spectra of NPCS; high-resolution (b) C 1s, (c) N 1s and (d) P 2p XPS spectra of NPCS.

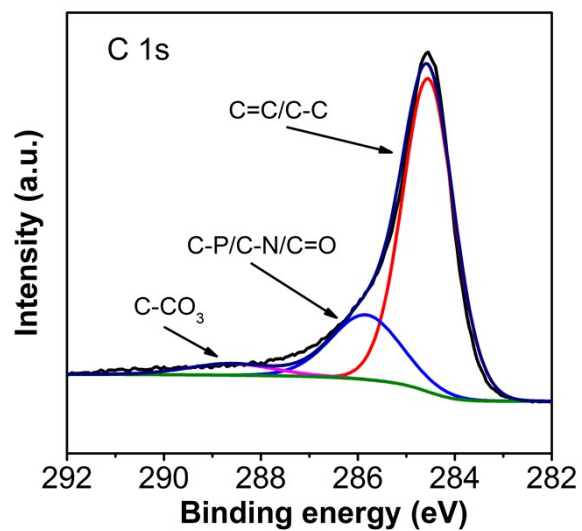

**Fig. S3** High-resolution XPS C 1s spectrum of MoP@NPCS.

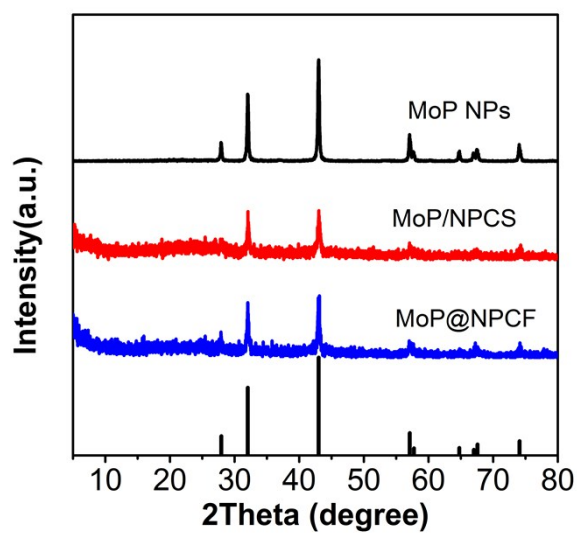

**Fig. S4** Wide-angle XRD patterns of MoP@NPCF, MoP/NPCS and MoP NPs. XRD analysis indicates that the prepared MoP NPs, MoP/NPCF and MoP@NPCF all exhibit hexagonal MoP phase (JCPDS No. 65-6487).

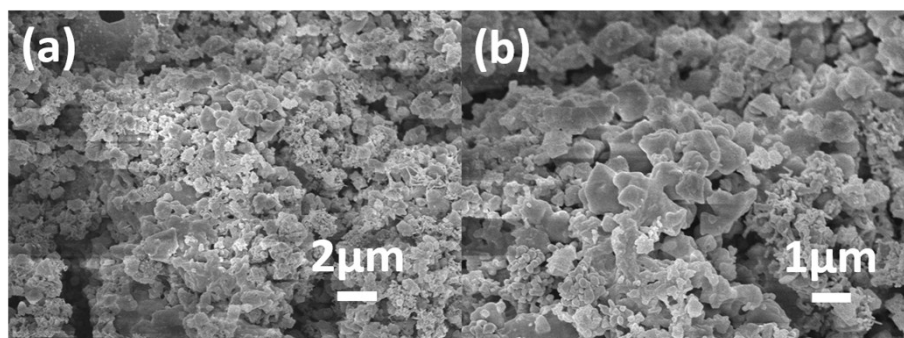

**Fig. S5** SEM images of MoP@NPCF.

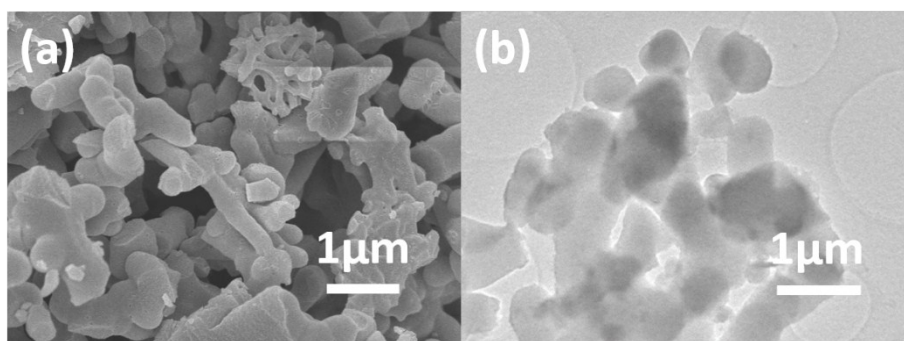

**Fig. S6** SEM (a) and TEM (b) images of NPCF.

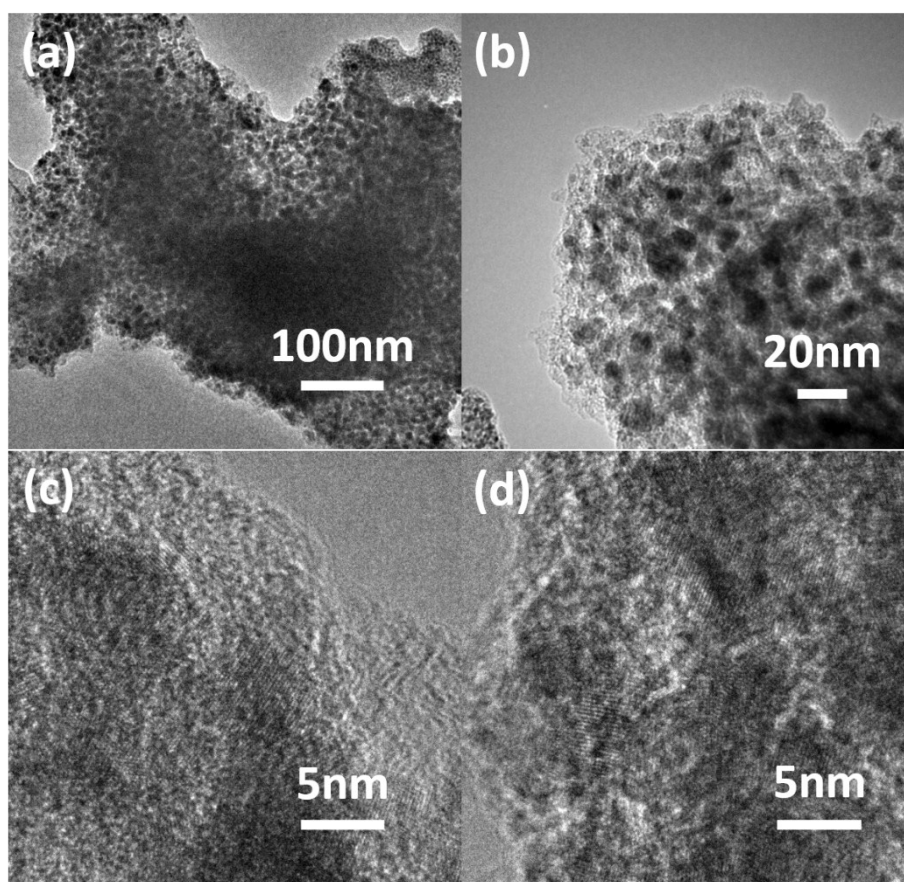

**Fig. S7** TEM images of MoP@NPCF.

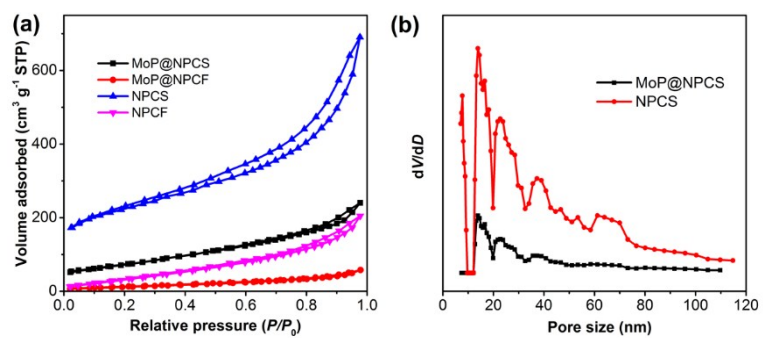

**Fig. S8** (a)  $N_2$  sorption isotherms of NPCS, MoP@NPCS, NPCF and MoP@NPCF, and (b) the corresponding pore size distribution curves of NPCS, MoP@NPCS.

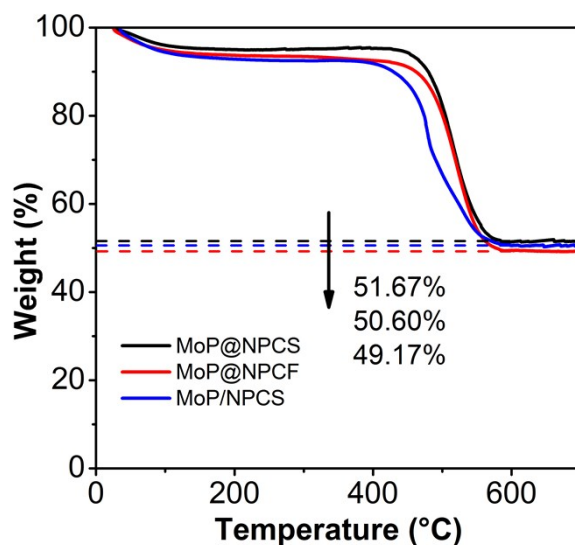

**Fig. S9** Thermal gravimetric curves of MoP@NPCS, MoP@NPCF and MoP/NPCS under the air flow.

As exhibited in TGA curves, the initial weight loss below 200 °C can be attributed to the evaporation of adsorbed water. Following, the obviously weight loss should be ascribed to the combustion of carbonaceous materials, and the gradual oxidation of MoP and transformation to MoO<sub>3</sub>. The remaining weights after heating over 600 °C are about 51.67 wt.%, 50.60 wt.% and 49.17 wt.% for MoP@NPCS, MoP@NPCF and MoP/NPCS, respectively.

Specially, the MoP content of these fabricated composites is calculated from the following equation:

$$m\%(\text{MoP}) = \text{residual mass} * M(\text{MoP})/M(\text{MoO}_3)$$

Therefore, the MoP contents in the MoP@NPCS, MoP@NPCF and MoP/NPCS are 45.55 wt.%, 44.63 wt.%, and 43.37 wt.%, respectively.

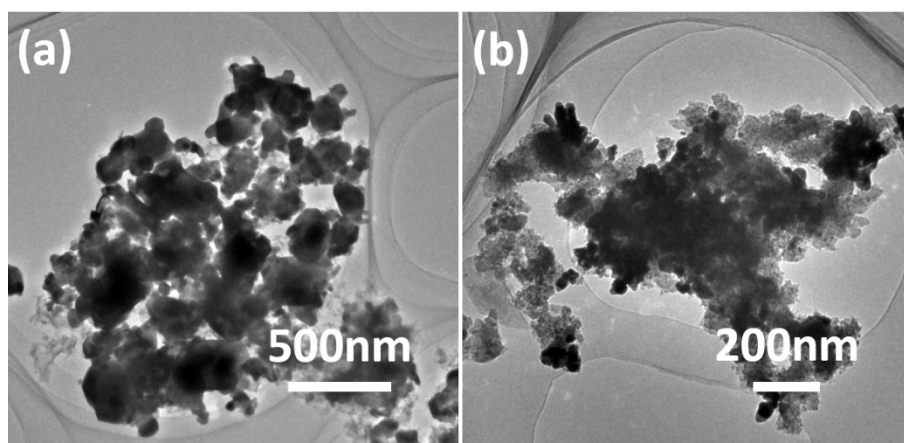

**Fig. S10** TEM images of MoP/NPCS.



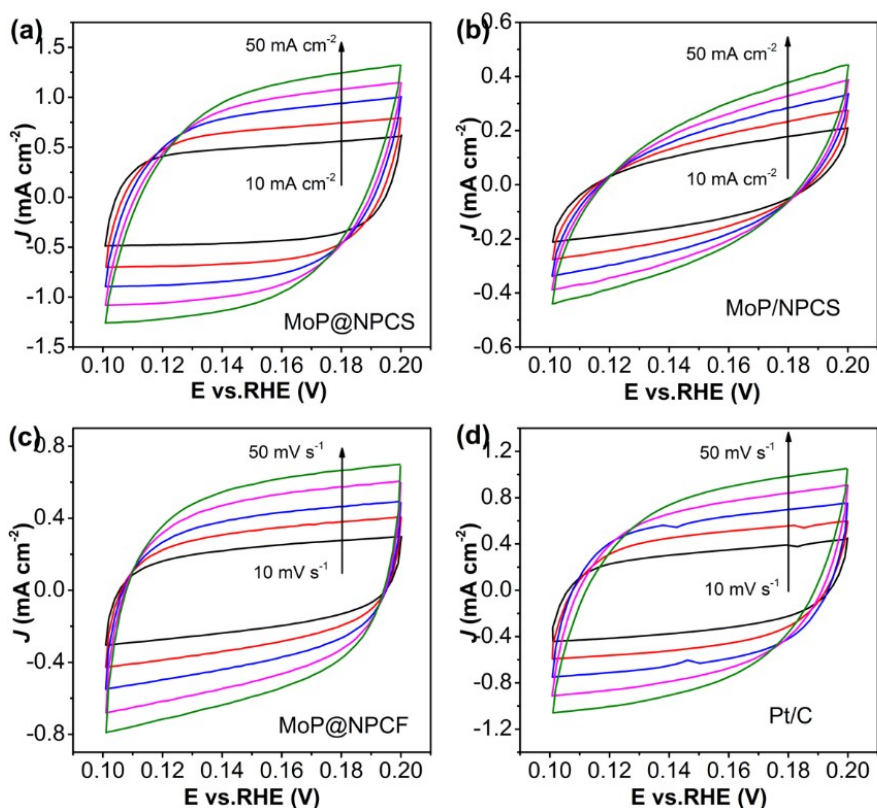

**Fig. S11** Cyclic voltammograms of (a) MoP@NPCS, (b) MoP/NPCS, (c) MoP@NPCF and (d) Pt/C measured at different scan rates from 10 to 50  $\text{mV s}^{-1}$ .

#### ECSA calculation:

The electrochemically active surface area (ECSA) can be determined using the capacitance ( $C_{dl}$ ). The specific capacitance for a flat surface is generally found to be in the range of 20~60  $\mu\text{F cm}^{-2}$ . In there, 40  $\mu\text{F cm}^{-2}$  was used in the following calculations of the ECSA as literatures generally did.

The following formula was used to calculate ECSA:<sup>1, 2</sup>

$$\text{ECSA} = \frac{C}{40 \mu\text{F cm}^{-2} \text{ per cm}^{-2}}$$

Therefore, the ECSA for MoP@NPCF, MoP@NPCS, MoP/NPCS and Pt/C were calculated to be 242.5, 422.4, 122.5 and 367.5  $\text{cm}^2$ , respectively.

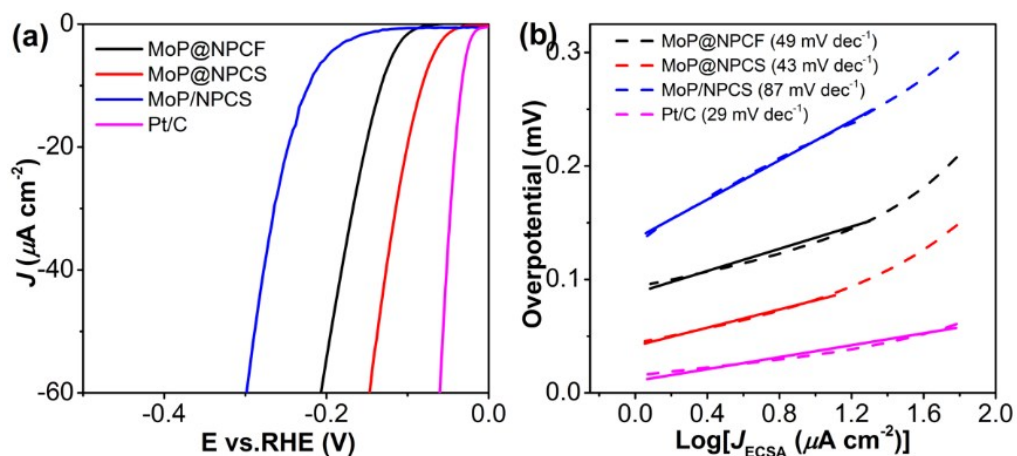

**Fig. S12** (a) Polarization curves and (b) Tafel plots normalized by ECSA for MoP@NPCF, MoP@NPCS, MoP/NPCS and reference Pt/C.

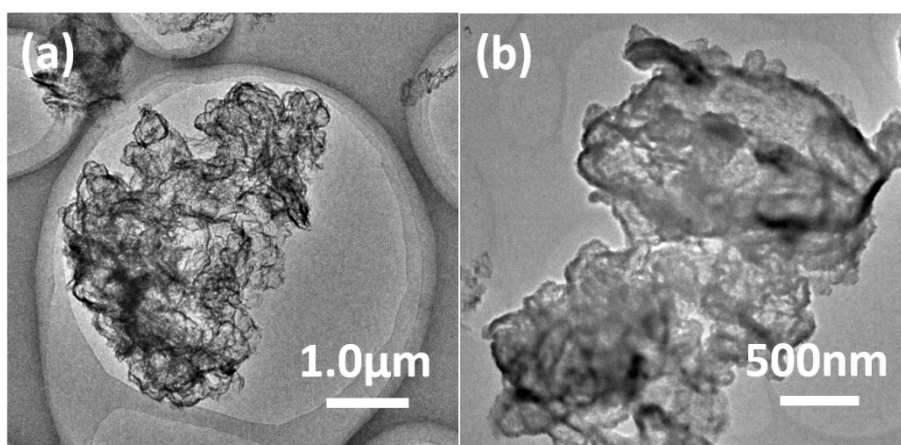

**Fig. S13** TEM images of NCS. The TEM images exhibits the sponge-like architecture of the prepared NCS, which is similar to that of NPCS.

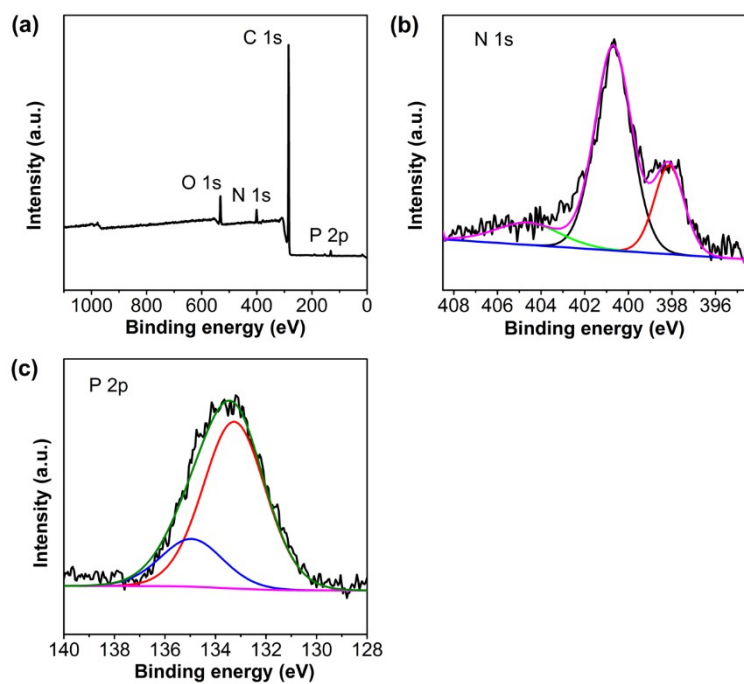

**Fig. S14** (a) XPS survey spectra of NPCF, and high-resolution (b) N 1s and (c) P 2p XPS spectra. There are 5.56 at% N, and 3.34 at% P in NPCF depending on the XPS analysis.

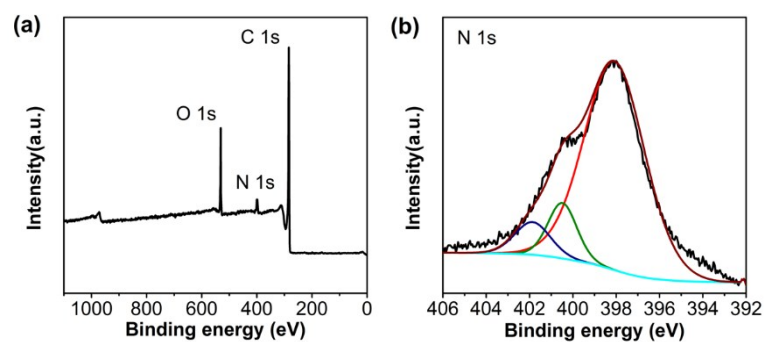

**Fig. S15** (a) XPS survey spectrum of NCS. (b) High-resolution XPS N 1s spectrum. There are 7.72 at% N in NCS depending on the XPS analysis.



## 2. Supplementary Tables

**Table S1.** Summary of the HER performance of Mo-based electrocatalysts in alkaline electrolyte.

| Catalyst                       | Electrolyte | $E_{J=10}$ (mV vs. RHE) | $J_0$ (mA cm <sup>-2</sup> ) | Tafel slope (mV dec <sup>-1</sup> ) | Ref.      |
|--------------------------------|-------------|-------------------------|------------------------------|-------------------------------------|-----------|
| MoP@NPCS                       | 1.0 M KOH   | 107                     | 0.127                        | 51                                  | This work |
| N, P-doped Mo <sub>2</sub> C@C | 1.0 M KOH   | 47                      | 2.042                        | 71                                  | S3        |
| N@MoPC <sub>x</sub>            | 1.0 M KOH   | 139                     | 0.3023                       | 86.6                                | S4        |
| Mo <sub>2</sub> C@NC           | 1.0 M KOH   | 60                      | N.A.                         | N.A.                                | S5        |
| $\beta$ -Mo <sub>2</sub> C     | 0.1 M KOH   | 112                     | N.A.                         | 55                                  | S6        |
| MoP <sub>2</sub> NPs/Mo        | 1.0 M KOH   | 194                     | N.A.                         | 80                                  | S7        |
| Mo <sub>x</sub> C-Ni@NCV       | 1.0 M KOH   | 126                     | N.A.                         | 93                                  | S8        |
| MoP                            | 1.0 M KOH   | 190                     | N.A.                         | N.A.                                | S9        |
| MoC <sub>x</sub>               | 1.0 M KOH   | 151                     | 0.029                        | 59                                  | S10       |
| MoP                            | 1.0 M KOH   | 130                     | 0.046                        | 48                                  | S11       |

**Table S2.** Summary of heteroatoms doped carbonaceous materials for OER in alkaline electrolyte.

| Catalyst                             | Electrolyte | Onset potential (V vs. RHE) | $E_{J=10}$ (V vs. RHE) | Tafel slope (mV dec <sup>-1</sup> ) | Ref.      |
|--------------------------------------|-------------|-----------------------------|------------------------|-------------------------------------|-----------|
| NPCS                                 | 1.0 M KOH   | 1.49                        | 1.62                   | 78                                  | This work |
| Porous carbon cloth                  | 1.0 M KOH   | N.A.                        | 1.59                   | 98                                  | S12       |
| N-doped graphene-carbon<br>nanotubes | 0.1 M KOH   | 1.54                        | 1.70                   | 141                                 | S13       |
| Defective graphene                   | 1.0 M KOH   | N.A.                        | 1.57                   | 97                                  | S14       |
| ONPPGC/OCC                           | 1.0 M KOH   | N.A.                        | 1.64                   | 84                                  | S15       |
| N, O-VAGNs/CC                        | 0.1 M KOH   | 1.574                       | 1.62                   | 45                                  | S16       |
| N-doped carbon microtube sponge      | 0.1 M KOH   | N.A.                        | 1.52                   | 246                                 | S17       |
| Nanoporous carbon nanofiber films    | 0.1 M KOH   | 1.43                        | about 1.85             | 274                                 | S18       |
| O-doped graphene                     | 1.0 M KOH   | N.A.                        | 1.68                   | N.A.                                | S19       |
| P-doped graphene                     | 1.0 M KOH   | 1.48                        | 1.56                   | 62                                  | S20       |
| N, F-doped graphene                  | 1.0 M KOH   | 1.45                        | 1.57                   | 78                                  | S21       |
| N,P,F tri-doped graphene             | 0.1 M KOH   | 1.62                        | N.A.                   | 136                                 | S22       |
| NPC-CP                               | 1.0 M KOH   | 1.51                        | 1.54                   | 87                                  | S23       |

**Table S3.** Summary of recently active bifunctional nonprecious electrocatalysts used for overall water splitting in alkaline electrolyte.

| Catalyst                                                                           | Substrate         | Electrolyte | $E_{J=10}$ (V) | $E_{J=20}$ (V) | Reference |
|------------------------------------------------------------------------------------|-------------------|-------------|----------------|----------------|-----------|
| NPCS // MoP@NPCS                                                                   | Carbonfiber cloth | 1.0 M KOH   | 1.70           | 1.76           | This work |
| Ni <sub>8</sub> P <sub>3</sub> /Ni // Ni <sub>8</sub> P <sub>3</sub> /Ni           | Ni foam           | 1.0 M KOH   | 1.61           | N.A.           | S24       |
| Ni <sub>3</sub> S <sub>2</sub> /Ni foam // Ni <sub>3</sub> S <sub>2</sub> /Ni foam | Ni foam           | 1.0 M KOH   | about 1.70     | N.A.           | S25       |
| Co-P film // Co-P film                                                             | Copper film       | 1.0 M KOH   | > 1.62         | N.A.           | S26       |
| CoOx@CN // CoOx@CN                                                                 | Ni foam           | 1.0 M KOH   | N.A.           | 1.55           | S27       |
| Ni <sub>5</sub> P <sub>4</sub> /Ni foil // Ni <sub>5</sub> P <sub>4</sub> /Ni foil | Ni foil           | 1.0 M KOH   | about 1.68     | N.A.           | S28       |
| NiS // NiS                                                                         | Ni foam           | 1.0 M KOH   | 1.61           | 1.67           | S29       |
| NiP/NF // NiP/NF                                                                   | Ni foam           | 1.0 M KOH   | 1.63           | 1.70           | S30       |
| NiCo <sub>2</sub> S <sub>4</sub> // NiCo <sub>2</sub> S <sub>4</sub>               | Ni foam           | 1.0 M KOH   | 1.63           | N.A.           | S31       |
| Ni <sub>2</sub> P // Ni <sub>2</sub> P                                             | Ni foam           | 1.0 M KOH   | 1.63           | N.A.           | S32       |
| NiSe // NiSe                                                                       | Ni foam           | 1.0 M KOH   | 1.63           | 1.75           | S33       |
| NiCoP // NiCoP                                                                     | Ti film           | 1.0 M KOH   | 1.65           | N.A.           | S34       |
| CoO-CNF // CoO-CNF                                                                 | Stainless steel   | 1.0 M KOH   | 1.63           | N.A.           | S35       |
| NiFe/NiCo <sub>2</sub> O <sub>4</sub> // NiFe/NiCo <sub>2</sub> O <sub>4</sub>     | Ni foam           | 1.0 M KOH   | 1.67           | N.A.           | S36       |
| Ni <sub>2</sub> P/Ni // Ni <sub>2</sub> P/Ni                                       | Ni foam           | 1.0 M KOH   | 1.49           | N.A.           | S37       |
| NiS <sub>x</sub> /Ni // NiS <sub>x</sub> /Ni                                       | Ni foam           | 1.0 M KOH   | 1.47           | 1.53           | S38       |
| CoP // CoP                                                                         | Ni foam           | 1.0 M KOH   | 1.62           | 1.66           | S39       |

### 3. Supplementary References

- S1. X.-D. Wang, Y.-F. Xu, H.-S. Rao, W.-J. Xu, H.-Y. Chen, W.-X. Zhang, D.-B. Kuang and C.-Y. Su, *Energy Environ. Sci.*, 2016, **9**, 1468-1475.
- S2. C. Tang, W. Wang, A. Sun, C. Qi, D. Zhang, Z. Wu and D. Wang, *ACS Catalysis*, 2015, **5**, 6956-6963.
- S3. Y. Y. Chen, Y. Zhang, W. J. Jiang, X. Zhang, Z. Dai, L. J. Wan and J. S. Hu, *ACS Nano*, 2016, **10**, 8851-8860.
- S4. Y. Huang, J. Ge, J. Hu, J. Zhang, J. Hao and Y. Wei, *Adv. Energy Mater.*, 2017, DOI: 10.1002/aenm.201701601.
- S5. Y. Liu, G. Yu, G. D. Li, Y. Sun, T. Asefa, W. Chen and X. Zou, *Angew. Chem. Int. Ed.*, 2015, **54**, 10752-10757.
- S6. F. X. Ma, H. B. Wu, B. Y. Xia, C. Y. Xu and X. W. D. Lou, *Angew. Chem. Int. Ed.*, 2015, **54**, 15395-15399.
- S7. Z. Pu, I. S. Amiinu, M. Wang, Y. Yang and S. Mu, *Nanoscale*, 2016, **8**, 8500-8504.
- S8. S. Wang, J. Wang, M. Zhu, X. Bao, B. Xiao, D. Su, H. Li and Y. Wang, *J. Am. Chem. Soc.*, 2015, **137**, 15753-15759.
- S9. T. Wang, K. Du, W. Liu, Z. Zhu, Y. Shao and M. Li, *J. Mater. Chem. A*, 2015, **3**, 4368-4373.
- S10. H. B. Wu, B. Y. Xia, L. Yu, X.-Y. Yu and X. W. D. Lou, *Nat. Commun.*, 2015, **6**, 6512.
- S11. P. Xiao, M. A. Sk, L. Thia, X. Ge, R. J. Lim, J.-Y. Wang, K. H. Lim and X. Wang, *Energy Environ. Sci.*, 2014, **7**, 2624-2629.
- S12. M.-S. Balogun, W. Qiu, H. Yang, W. Fan, Y. Huang, P. Fang, G. Li, H. Ji and Y. Tong, *Energy Environ. Sci.*, 2016, **9**, 3411-3416.
- S13. S. Chen, J. Duan, M. Jaroniec and S. Z. Qiao, *Adv. Mater.*, 2014, **26**, 2925-2930.
- S14. Y. Jia, L. Zhang, A. Du, G. Gao, J. Chen, X. Yan, C. L. Brown and X. Yao, *Adv. Mater.*, 2016, **28**, 9532-9538.
- S15. J. Lai, S. Li, F. Wu, M. Saqib, R. Luque and G. Xu, *Energy Environ. Sci.*, 2016, **9**, 1210-1214.
- S16. D. Li, B. Ren, Q. Jin, H. Cui and C. Wang, *J. Mater. Chem. A*, 2018, **6**, 2176-2183.
- S17. J.-C. Li, P.-X. Hou, S.-Y. Zhao, C. Liu, D.-M. Tang, M. Cheng, F. Zhang and H.-M. Cheng, *Energy Environ. Sci.*, 2016, **9**, 3079-3084.
- S18. Q. Liu, Y. Wang, L. Dai and J. Yao, *Adv. Mater.*, 2016, **28**, 3000-3006.
- S19. Z. Liu, Z. Zhao, Y. Wang, S. Dou, D. Yan, D. Liu, Z. Xia and S. Wang, *Adv. Mater.*, 2017, **29**, 1606207.
- S20. Z. Xiao, X. Huang, L. Xu, D. Yan, J. Huo and S. Wang, *Chem. Commun.*, 2016, **52**, 13008-13011.
- S21. X. Yue, S. Huang, J. Cai, Y. Jin and P. K. Shen, *J. Mater. Chem. A*, 2017, **5**, 7784-7790.
- S22. J. Zhang and L. Dai, *Angew. Chem. Int. Ed.*, 2016, **128**, 13490-13494.
- S23. Y. P. Zhu, Y. Jing, A. Vasileff, T. Heine and S. Z. Qiao, *Adv. Energy Mater.*, 2017, **7**, 1602928.
- S24. G.-F. Chen, T. Y. Ma, Z.-Q. Liu, N. Li, Y.-Z. Su, K. Davey and S.-Z. Qiao, *Adv. Funct. Mater.*, 2016, **26**, 3314-3323.
- S25. L. L. Feng, G. Yu, Y. Wu, G. D. Li, H. Li, Y. Sun, T. Asefa, W. Chen and X. Zou, *J. Am. Chem. Soc.*, 2015, **137**, 14023-14026.
- S26. N. Jiang, B. You, M. Sheng and Y. Sun, *Angew. Chem. Int. Ed.*, 2015, **54**, 6251-6254.
- S27. H. Jin, J. Wang, D. Su, Z. Wei, Z. Pang and Y. Wang, *J. Am. Chem. Soc.*, 2015, **137**, 2688-2694.
- S28. M. Ledendecker, S. Krick Calderon, C. Papp, H. P. Steinruck, M. Antonietti and M. Shalom, *Angew. Chem. Int. Ed.*, 2015, **54**, 12361-12365.
- S29. J.-T. Ren and Z.-Y. Yuan, *ACS Sustainable Chem. Eng.*, 2017, **5**, 7203-7210.
- S30. J. Ren, Z. Hu, C. Chen, Y. Liu and Z. Yuan, *J. Energy Chem.*, 2017, **26**, 1196-1202.
- S31. A. Sivanantham, P. Ganesan and S. Shanmugam, *Adv. Funct. Mater.*, 2016, **26**, 4661-4672.

- S32. L.-A. Stern, L. Feng, F. Song and X. Hu, *Energy Environ. Sci.*, 2015, **8**, 2347-2351.
- S33. C. Tang, N. Cheng, Z. Pu, W. Xing and X. Sun, *Angew. Chem. Int. Ed.*, 2015, **54**, 9351-9355.
- S34. C. Wang, J. Jiang, T. Ding, G. Chen, W. Xu and Q. Yang, *Adv. Mater. Interfaces*, 2015, **3**, 1500454.
- S35. H. Wang, H.-W. Lee, Y. Deng, Z. Lu, P.-C. Hsu, Y. Liu, D. Lin and Y. Cui, *Nat. Commun.*, 2015, **6**, 7261.
- S36. C. Xiao, Y. Li, X. Lu and C. Zhao, *Adv. Funct. Mater.*, 2016, **26**, 3515-3523.
- S37. B. You, N. Jiang, M. Sheng, M. W. Bhushan and Y. Sun, *ACS Catal.*, 2015, **5**, 714-721.
- S38. B. You and Y. Sun, *Adv. Energy Mater.*, 2016, **6**, 1502333.
- S39. Y. P. Zhu, Y. P. Liu, T. Z. Ren and Z. Y. Yuan, *Adv. Funct. Mater.*, 2015, **25**, 7337-7347.
